# Supplementary material for: Highly conductive, stretchable, and breathable epidermal electrode based on hierarchically interactive nano-network
Source: Royal Society of Chemistry journal article supplement (doi:10.1039/d0nr03189e), 2020-01-01
Supplement: d0nr03189e1.pdf [file d0nr03189e1.pdf]

## Electronic supplementary information (ESI)

### Highly Conductive, Stretchable, and Breathable Epidermal Electrode Based on Hierarchically Interactive Nano-network

You Jun Fan<sup>‡abc</sup>, Peng Tao Yu<sup>‡ac</sup>, Fei Liang<sup>ac</sup>, Xin Li<sup>ac</sup>, Hua Yang Li<sup>d</sup>, Lu Liu<sup>ac</sup>, Jin Wei Cao<sup>d</sup>, Xue Jiao Zhao<sup>ac</sup>, Zhong Lin Wang<sup>ace</sup>, and Guang Zhu<sup>acd\*</sup>

<sup>a</sup>CAS Center for Excellence in Nanoscience, Beijing Key Laboratory of Micro-Nano Energy and Sensor, Beijing Institute of Nanoenergy and Nanosystems, Chinese Academy of Sciences, Beijing 100083, China

<sup>b</sup>State Key Lab of New Ceramics and Fine Processing, School of Materials Science and Engineering, Tsinghua University, Beijing 100084, China

<sup>c</sup>School of Nanoscience and Technology, University of Chinese Academy of Sciences, Beijing 100049, China

<sup>d</sup>New Materials Institute, Department of Mechanical, Materials and Manufacturing Engineering, University of Nottingham Ningbo China, Ningbo 315100, China

<sup>e</sup>School of Materials Science and Engineering, Georgia Institute of Technology, Atlanta, GA 30332, United States

<sup>‡</sup> These authors contributed equally.

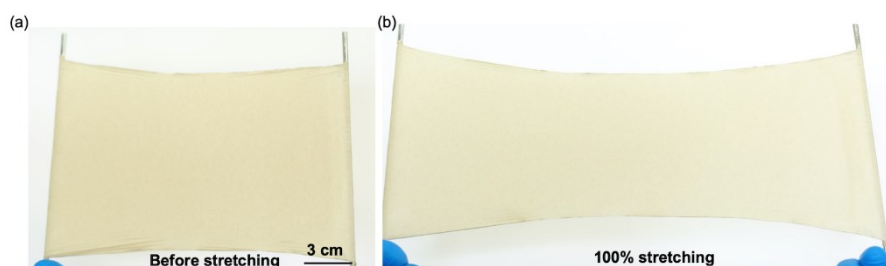

**Fig. S1** (a, b) Optical camera images of the SEE film with large area before stretching and under strain of 100%.

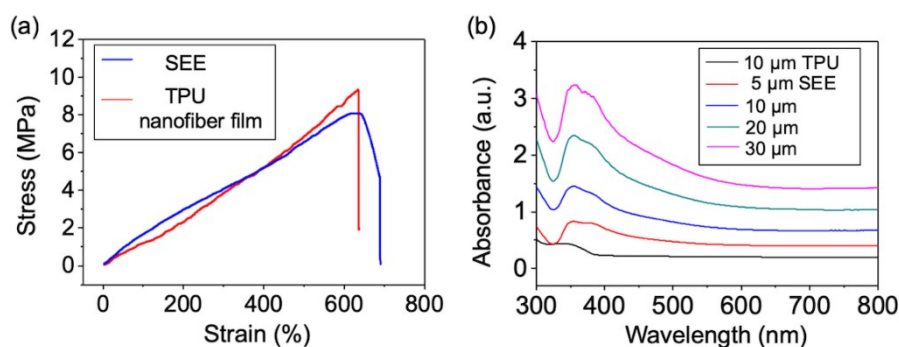

**Fig. S2** (a) Stress–strain curves for the pure TPU nanofiber mat and the SEE. (b) UV-Vis absorbance spectra of the SEE with different thickness and a pure TPU nanofiber film.

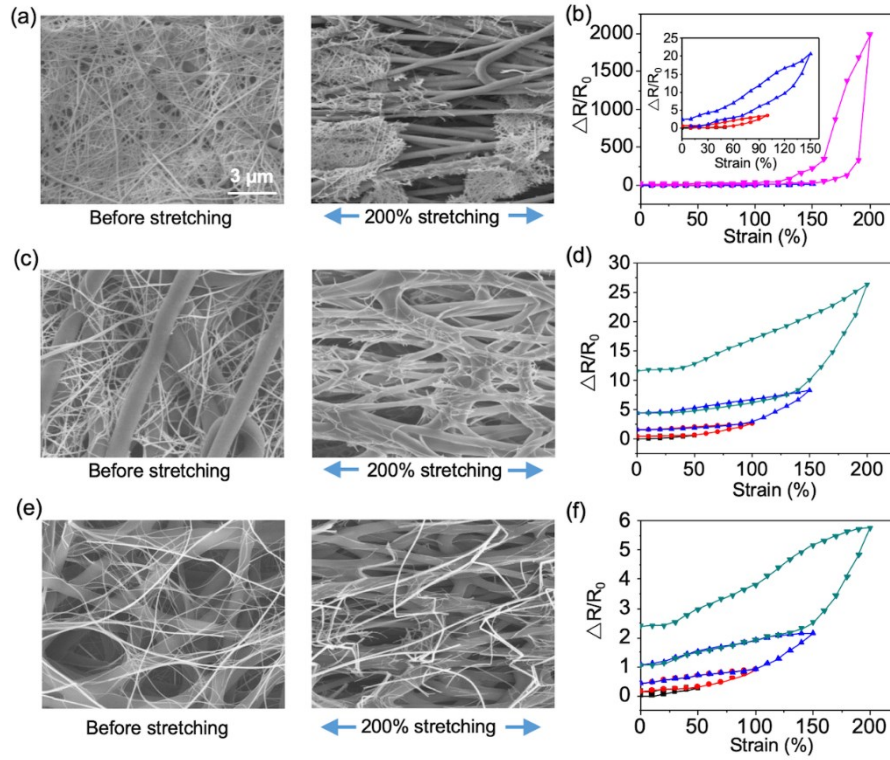

**Fig. S3** SEM images of the SEE with different structures before (left) and after (right) stretching (a, c, e), and their cyclic change in resistance  $\Delta R/R_0$  versus strain (b, d, f). (a) The SEE with layer by layer structure that AgNWs are deposited on TPU nanofiber mat. (c) The SEE with bonding interactive nanonetwork of TPU nanofibers and AgNWs. (e) The SEE of hierarchically interactive nanonetwork with discrete distribution of AgNWs.

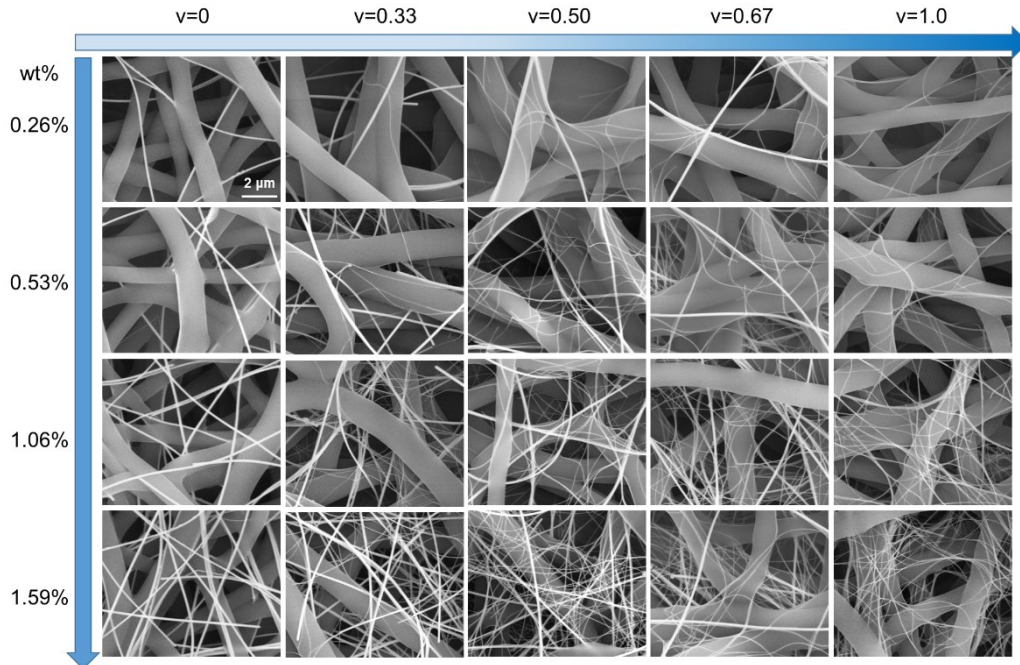

**Fig. S4** SEM images of the SEE with different AgNWs contents and different component ratio of D30 and D120 AgNWs ( $v = \text{Weight D30 AgNWs} / \text{Weight total AgNWs}$ ).

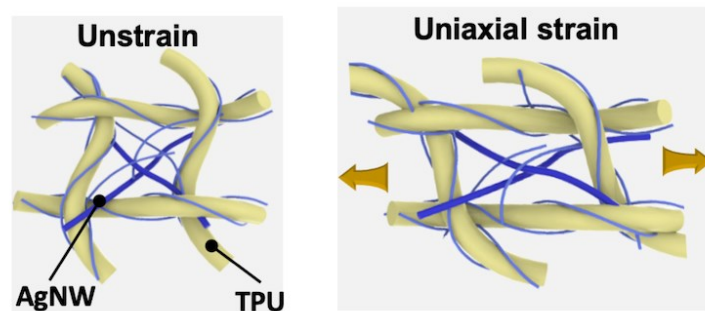

**Fig. S5** Schematic diagram of the initial configuration (left) and the deformed configuration (right) at a uniaxial strain for the nano-network of the SEE.

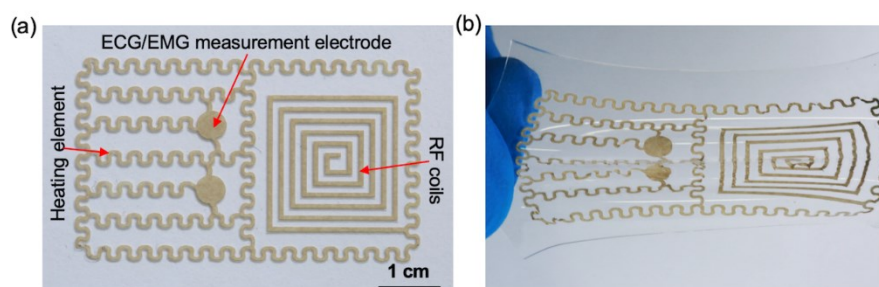

**Fig. S6** Photographs of elastic circuits fabricated by SEE on a flexible PDMS film before (a) and after (b) stretching.

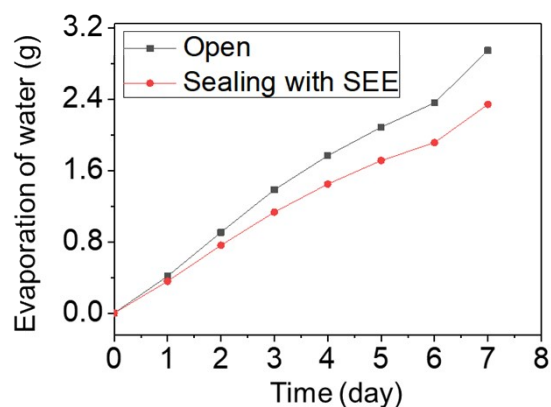

**Fig. S7** Permeability property of water for the SEE, comparing with the evaporation of water in an open environment.

**Table S1. The performance comparisons among AgNW-based electrodes.**

| Materials                               | Strategies                                              | Conductivity/Sheet resistance                                                          | Stretchability                                 | Reference |
|-----------------------------------------|---------------------------------------------------------|----------------------------------------------------------------------------------------|------------------------------------------------|-----------|
| <b>AgNWs</b>                            | Roll-roll welding                                       | Single-sided conductive, 5 $\Omega$ sq <sup>-1</sup>                                   | Strain <2%                                     | 1         |
| <b>AgNWs on PET</b>                     | Direct printed on PET                                   | Single-sided conductive, 100 $\Omega$ sq <sup>-1</sup>                                 | No stretchability                              | 2         |
| <b>Ag NWs/PDMS</b>                      | Composite                                               | 9.8 $\Omega$                                                                           | Increase with strain up to 100%                | 3         |
| <b>Ag-MWNT/ PVDF</b>                    | Composite                                               | 3100 S cm <sup>-2</sup> at 8.60 wt% Ag flakes.                                         | 20 S cm <sup>-2</sup> at 140% strain           | 4         |
| <b>AgNWs/PU</b>                         | Layer-by-layer filtration                               | 10000 S m <sup>-1</sup>                                                                | 250%                                           | 5         |
| <b>AgNW/dopamine-modified PDMS</b>      | Composite                                               | 35 $\Omega$ sq <sup>-1</sup> , at 7 wt % AgNWs.                                        | Stable within 15%                              | 6         |
| <b>Ultralong AgNWs/ Ecoflex</b>         | Transferring on a pre-strained (300%) elastomer         | Single-sided conductive, 9-70 $\Omega$ sq <sup>-1</sup>                                | 460%                                           | 7         |
| <b>PUS/AgNW/ PDMS</b>                   | 2D/3D binary networks                                   | 8.35-19.2 S cm <sup>-1</sup> , AgNW mass fraction (0.5-3.3%)                           | Increase by 160% at 100% strain                | 8         |
| <b>Au-AgNW/ SBS</b>                     | Composite, Au coated Ag NWs                             | 41850 S cm <sup>-1</sup> , at Au-AgNW weight fraction of 60%-75%                       | 266% (max:840%)                                | 9         |
| <b>3D AgNW/PDMS</b>                     | 2D/3D binary networks                                   | 21.5 S cm <sup>-1</sup> , at AgNW density of 25 mg cm <sup>-3</sup>                    | Increase by 150% at 100%                       | 10        |
| <b>AgNW/PU</b>                          | Composite                                               | 8-44.7 $\Omega$ sq <sup>-1</sup>                                                       | Conductive at 60%                              | 11        |
| <b>AgNW/PDMS/Zo ny</b>                  | Composite                                               | 4.5 $\Omega$ sq <sup>-1</sup>                                                          | Increase with strain up to 100%                | 12        |
| <b>AgNW/PU nanofibers</b>               | layer-by-layer                                          | 9190 S cm <sup>-1</sup>                                                                | 310%                                           | 13        |
| <b>Epoxy/NBR &amp; AgNW/PU</b>          | Epoxy/NBR fiber spray coated with AgNW/PU nanocomposite | 51 $\Omega$                                                                            | less than 150 $\Omega$ by stretching up to 40% | 14        |
| <b>Muliti-level AgNWs/TPU nanofiber</b> | Hierarchically interactive nano-network                 | 4800 S cm <sup>-1</sup> (0.41 $\Omega$ sq <sup>-1</sup> ), at volume fraction of 1.59% | Conductive at 500% strain                      | This work |

## Reference

- 1 S. J. Lee, Y.-H. Kim, J. K. Kim, H. Baik, J. H. Park, J. Lee, J. Nam, J. H. Park, T.-W. Lee, G.-R. Yi and J. H. Cho, *Nanoscale*, 2014, **6**, 11828-11834.
- 2 P.-H. Wang, S.-P. Chen, C.-H. Su and Y.-C. Liao, *Rsc Adv.*, 2015, **5**, 98412-98418.
- 3 C. Yan, X. Wang, M. Cui, J. Wang, W. Kang, C. Y. Foo and P. S. Lee, *Adv. Energy Mater.*, 2014, **4**, 1301396.
- 4 K.-Y. Chun, Y. Oh, J. Rho, J.-H. Ahn, Y.-J. Kim, H. R. Choi and S. Baik, *Nat. Nanotech.*, 2010, **5**, 853-857.
- 5 C. S. Boland, U. Khan, H. Benameur and J. N. Coleman, *Nanoscale*, 2017, **9**, 18507-18515.

- 6 T. Akter and W. S. Kim, *ACS Appl. Mater. Interfaces*, 2012, **4**, 1855-11859.
- 7 P. Lee, J. Lee, H. Lee, J. Yeo, S. Hong, K. H. Nam, D. Lee, S. S. Lee and S. H. Ko, *Adv. Mater*, 2012, **24**, 3326-3332.
- 8 J. Ge, H. B. Yao, X. Wang, Y. D. Ye, J. L. Wang, Z. Y. Wu, J. W. Liu, F. J. Fan, H. L. Gao, C. L. Zhang and S. H. Yu, *Angew. Chem. Int. Ed.*, 2013, **52**, 1654-1659.
- 9 S. Choi, S. I. Han, D. Jung, H. J. Hwang, C. Lim, S. Bae, O. K. Park, C. M. Tschabrunn, M. Lee, S. Y. Bae, J. W. Yu, J. H. Ryu, S.-W. Lee, K. Park, P. M. Kang, W. B. Lee, R. Nezafat, T. Hyeon and D. H. Kim, *Nat. Nanotech.*, 2018, **13**, 1048-1056.
- 10 H. L. Gao, L. Xu, F. Long, Z. Pan, Y. X. Du, Y. Lu, J. Ge and S. H. Yu, *Angew. Chem. Int. Ed.*, 2014, **53**, 4561-4566.
- 11 W. Hu, X. Niu, R. Zhao and Q. Pei, *Appl. Phys. Lett.*, 2013, **102**, 38.
- 12 J. Wang, C. Yan, W. Kang and P. S. Lee, *Nanoscale*, 2014, **6**, 10734-10739.
- 13 Z. Jiang, M. O. G. Nayeem, K. Fukuda, S. Ding, H. Jin, T. Yokota, D. Inoue, D. Hashizume and T. Someya, *Adv. Mater.*, 2019, **31**, 1903446.
- 14 H. Y. Liu, H. C. Hsieh, J. Y. Chen, C. C. Shih, W. Y. Lee, Y. C. Chiang, W. C. Chen. *Macromol. Chem. Phys.* 2019, **220**, 1800387.
